# Supplementary material
Source: publisher figshare collection journal article supplement (https://aacr.figshare.com/ndownloader/files/39815462)
Supplement: Supplementary file 1 [file 39815462]

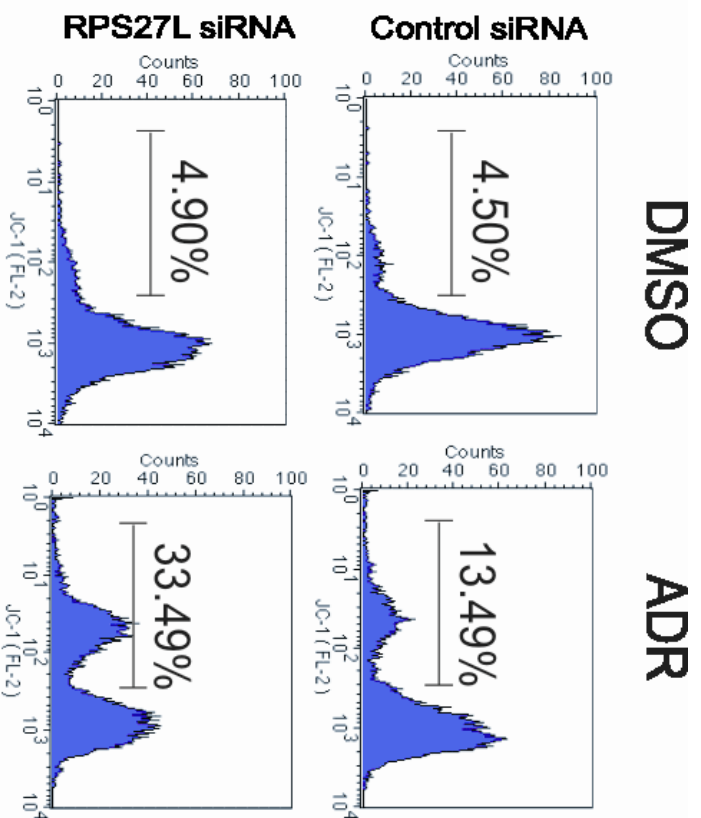

Supplementary Figure S3. HCT116 cells were treated as in (D) followed by JC-1 staining and flow cytometry analysis. Mitochondrial impairment was represented as the percentage of cells with lower membrane potential.
